# Supplementary material for: Copper–manganese mixed oxides: CO2-selectivity, stable, and cyclic performance for chemical looping combustion of methane
Source: Royal Society of Chemistry journal article supplement (doi:10.1039/c4cp01747a), 2014-01-01
Supplement: c4cp01747a1.pdf [file c4cp01747a1.pdf]

## Supporting Information

# Copper-Manganese Mixed Oxides: CO<sub>2</sub>-selectivity, Stable, and Cyclic Performance for Chemical Looping Combustion of Methane

Pallavi Mungse, Govindachetty Saravanan,\* Tomoki Uchiyama, Maiko Nishibori, Yasutake Teraoka, Sadhana Rayalu, and Nitin Labhsetwar \*

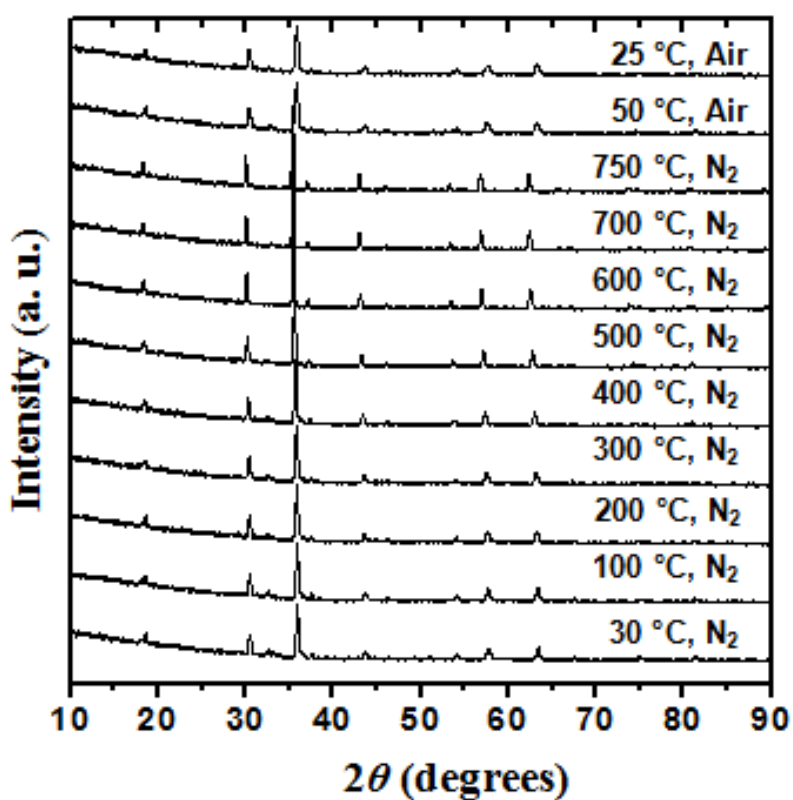

**Figure S1.** Temperature controlled *p*XRD profiles of CuMn<sub>2</sub>O<sub>4</sub> at various temperatures in the presence of N<sub>2</sub> and air. CuMn<sub>2</sub>O<sub>4</sub> was heated in the presence of N<sub>2</sub> up to 750 °C and cooled down to 25 °C in the presence of air.

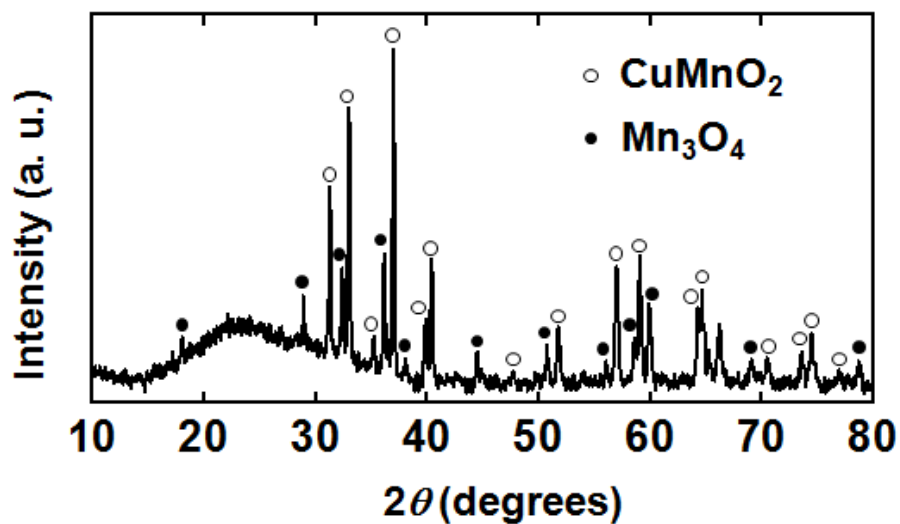

Figure S2. *p*XRD profile of  $\text{CuMn}_2\text{O}_4$  after  $\text{O}_2$ -TPD experiments.

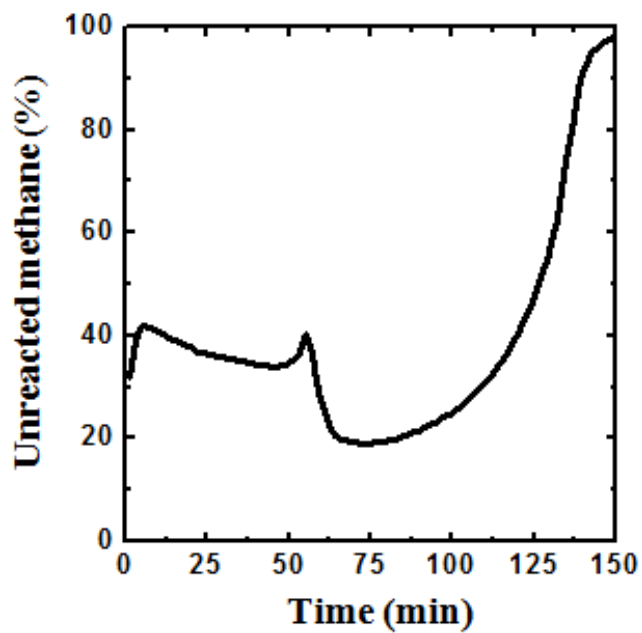

Figure S3. The dependence of un-reacted methane in the effluent stream of the outlet of the reactor as a function of time.

Figure S3 shows the percentage of un-reacted CH<sub>4</sub> in the effluent stream of the reactor outlet as a function of time. Approximately, 30 to 40% of un-reacted CH<sub>4</sub> was observed during initial stage of CH<sub>4</sub> combustion, however, the concentration of un-reacted CH<sub>4</sub> was decreased up to 20 % at around 75 min. The concentration of un-reacted CH<sub>4</sub> was reached 100 % at a later stage of CH<sub>4</sub> combustion reaction of CM. The observed trend is again consistent with the trends observed from CH<sub>4</sub> combustion performance (Figure 5).

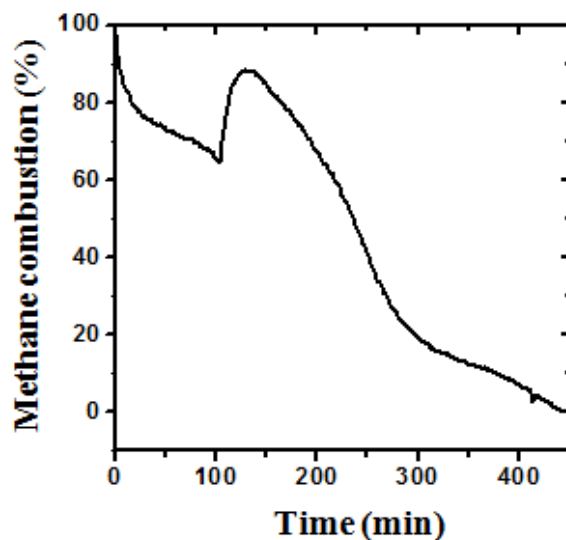

**Figure S4.** The CH<sub>4</sub> combustion efficiency for CuMn<sub>2</sub>O<sub>4</sub> at the concentration of 2.5 % of CH<sub>4</sub> in the effluent stream as a function of time.

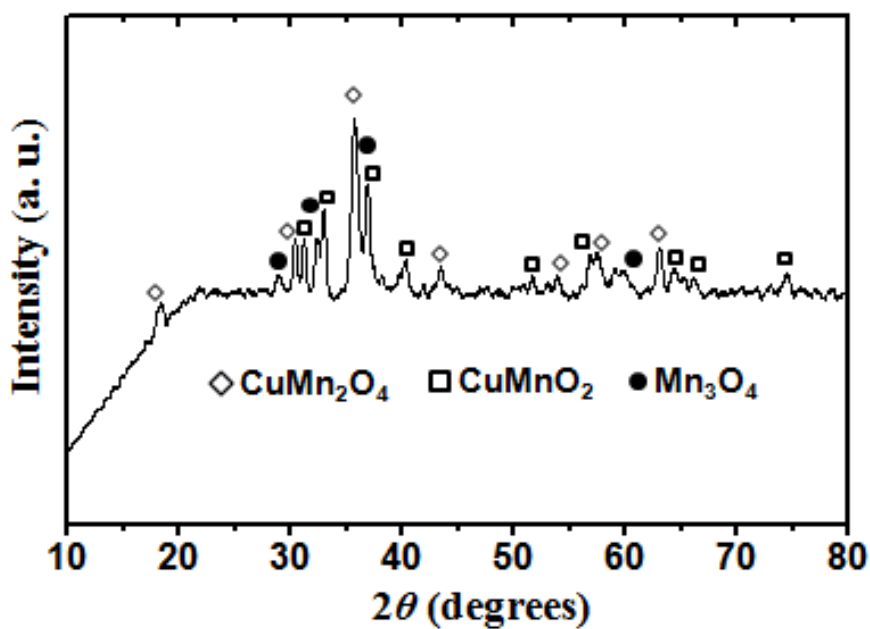

**Figure S5.** *p*XRD profile of the intermediate product recovered at 20 min.

*p*XRD analysis was performed to identify the structures of CM at the intermediate stage after at 20 min. as shown in Figure S5. The CH<sub>4</sub> combustion reaction was intentionally terminated at 20 min and the materials were recovered to perform *p*XRD analysis to identify the intermediate products. In addition to the characteristic peaks for CuMn<sub>2</sub>O<sub>4</sub> (Figure 1), the material recovered at 20 min also showed the characteristic peaks of CuMnO<sub>2</sub>, (J. Töpfer, M. Trari, P. Gravereau, J. P. Chaminade and J. P. Doumerc, *Crystalline Materials*, 1995, **210**, 184-187.) and Mn<sub>3</sub>O<sub>4</sub>. CuMn<sub>2</sub>O<sub>4</sub> is thermally decomposed into the products of CuMnO<sub>2</sub> and Mn<sub>3</sub>O<sub>4</sub> (Figure 4a) during CLC reaction for methane.

Figure S6a shows the *p*XRD profile for CMO (re-oxidized CuMn<sub>2</sub>O<sub>4</sub>), which is virtually consistent with the *p*XRD profile of original material CM (see Figure 1). CMO showed the characteristic peaks at 18.4°, 30.3°, 35.7°, 37.3°, 43.4°, 53.8°, 57.4°, 63°, and 74.6° for the reflection planes of (111), (220), (311), (222), (400), (422), (511), (440) and (533) respectively, correspond to CM. These results clearly indicate that CMO possesses Cu-Mn-O phase similar to CM after re-oxidation of CMR. Therefore, Cu-Mn-O phase can be readily reinstated by annealing of CMR at 900 °C in the presence of air, which makes it a potential material for CLC applications.

CMO was examined further to observe their morphology after reduction and re-oxidation cycles. Figure S6b-c represents the FE-SEM images of CMO that showed the large-sized, agglomerated particles, which are again in irregular shapes as similar to CM (Figure 2a). The morphology of CM was not retained after CLC evaluation and re-oxidation; however, the particles are having the dense surfaces as shown in the magnified FE-SEM image (Figure S6c). These results suggest that Cu-Mn-O phase can be retained without affecting their structure after reduction and re-oxidation cycles.

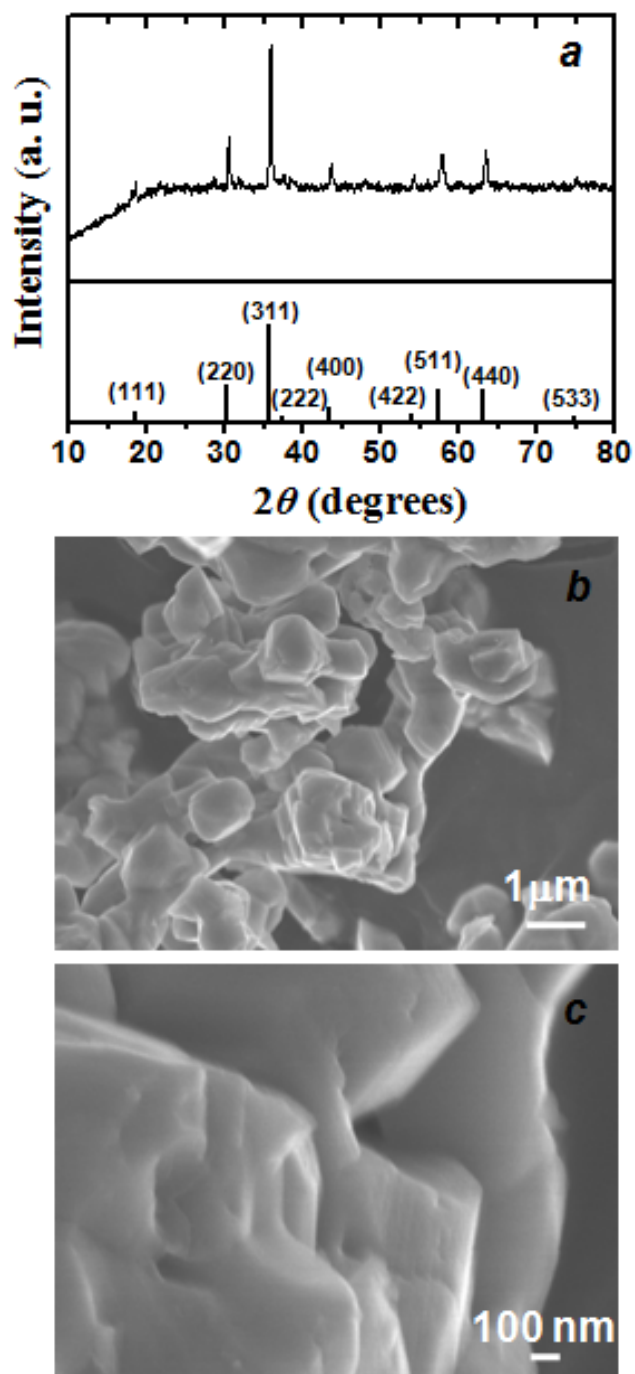

**Figure S6.** (a) *p*XRD profile of CMO (re-oxidized  $\text{CuMn}_2\text{O}_4$ ). The simulated XRD lines for pure  $\text{CuMn}_2\text{O}_4$  are shown by solid lines. (b-c) FE-SEM images of CMO.

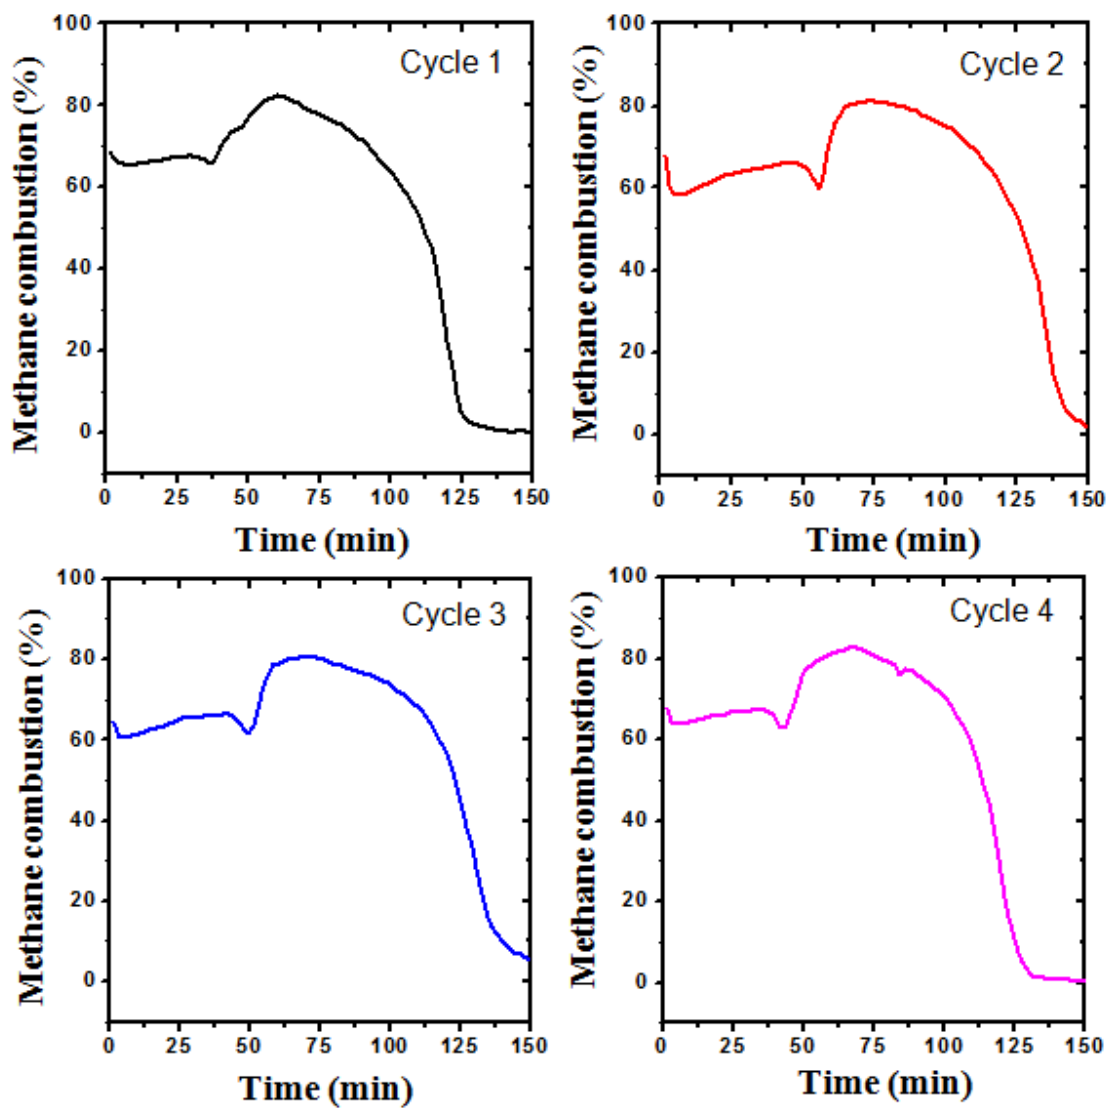

Figure S7. Multi-cycle CH<sub>4</sub> combustion performance of CuMn<sub>2</sub>O<sub>4</sub> as a function of time.
